# Supplementary material
Source: publisher figshare collection journal article supplement (https://tandf.figshare.com/articles/dataset/_/4039986)
Supplement: Supplementary file 1 [file 2]

## **Supplementary Information**

### **GFRA1 Promotes Cisplatin-induced Chemoresistance in Osteosarcoma by Inducing Autophagy**

Mihwa Kim, Ji-Yeon Jung, Seungho Choi, Hyunseung Lee, Liza D. Morales, Jeong-Tae Koh, Sun Hun Kim, Yoo-Duk Choi, Chan Choi, Thomas J. Slaga, Won Jae Kim & Dae Joon Kim

**Figure S1**

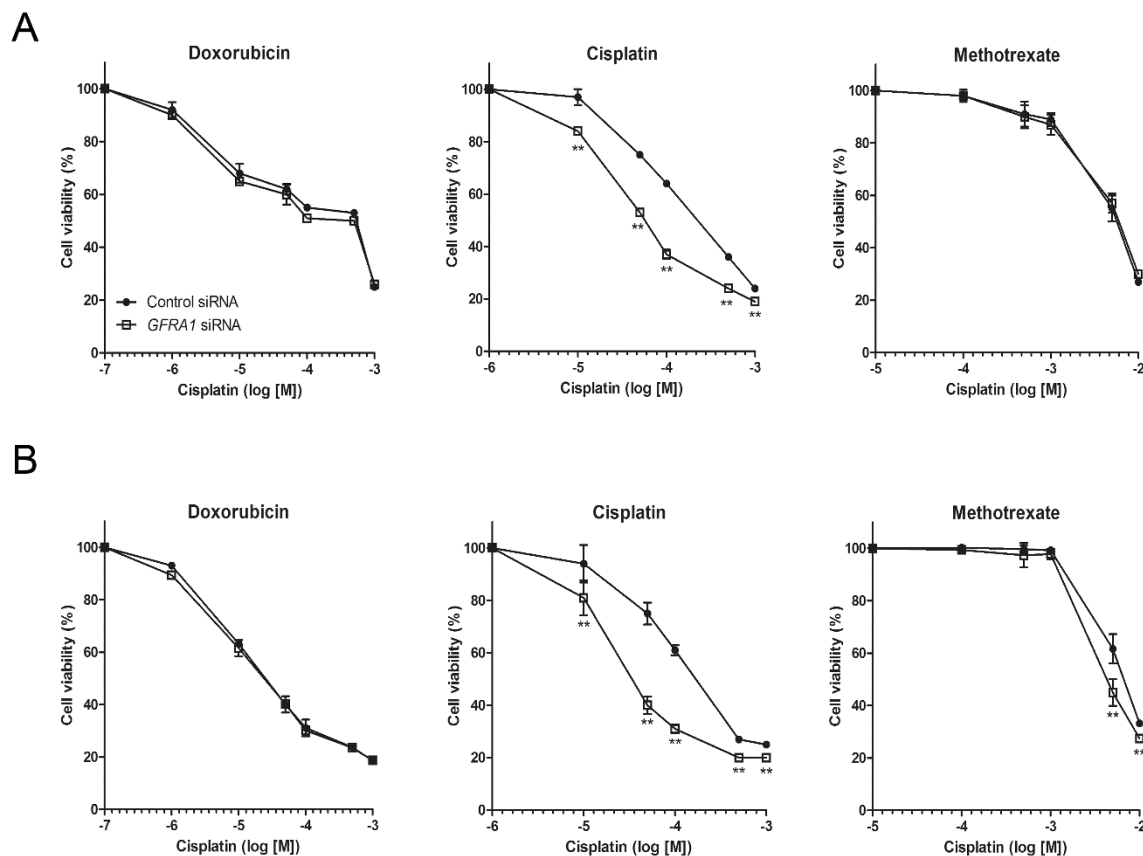

**Figure S1.** Cell viability of GFRA1-deficient osteosarcoma cells after treatment of chemotherapeutic agents. MG-63 and U-2 OS cells were transfected with either control siRNA or *GFRA1* siRNA for 48 h and then treated with different concentrations of doxorubicin, cisplatin, or methotrexate for 24 h. Cell viability was measured using the WST-1 assay. The values are presented as a mean  $\pm$  s.d.m. (n=3). \*\* denotes  $P < 0.05$ . (A) MG-63 cells. (B) U-2 OS cells.

Figure S2

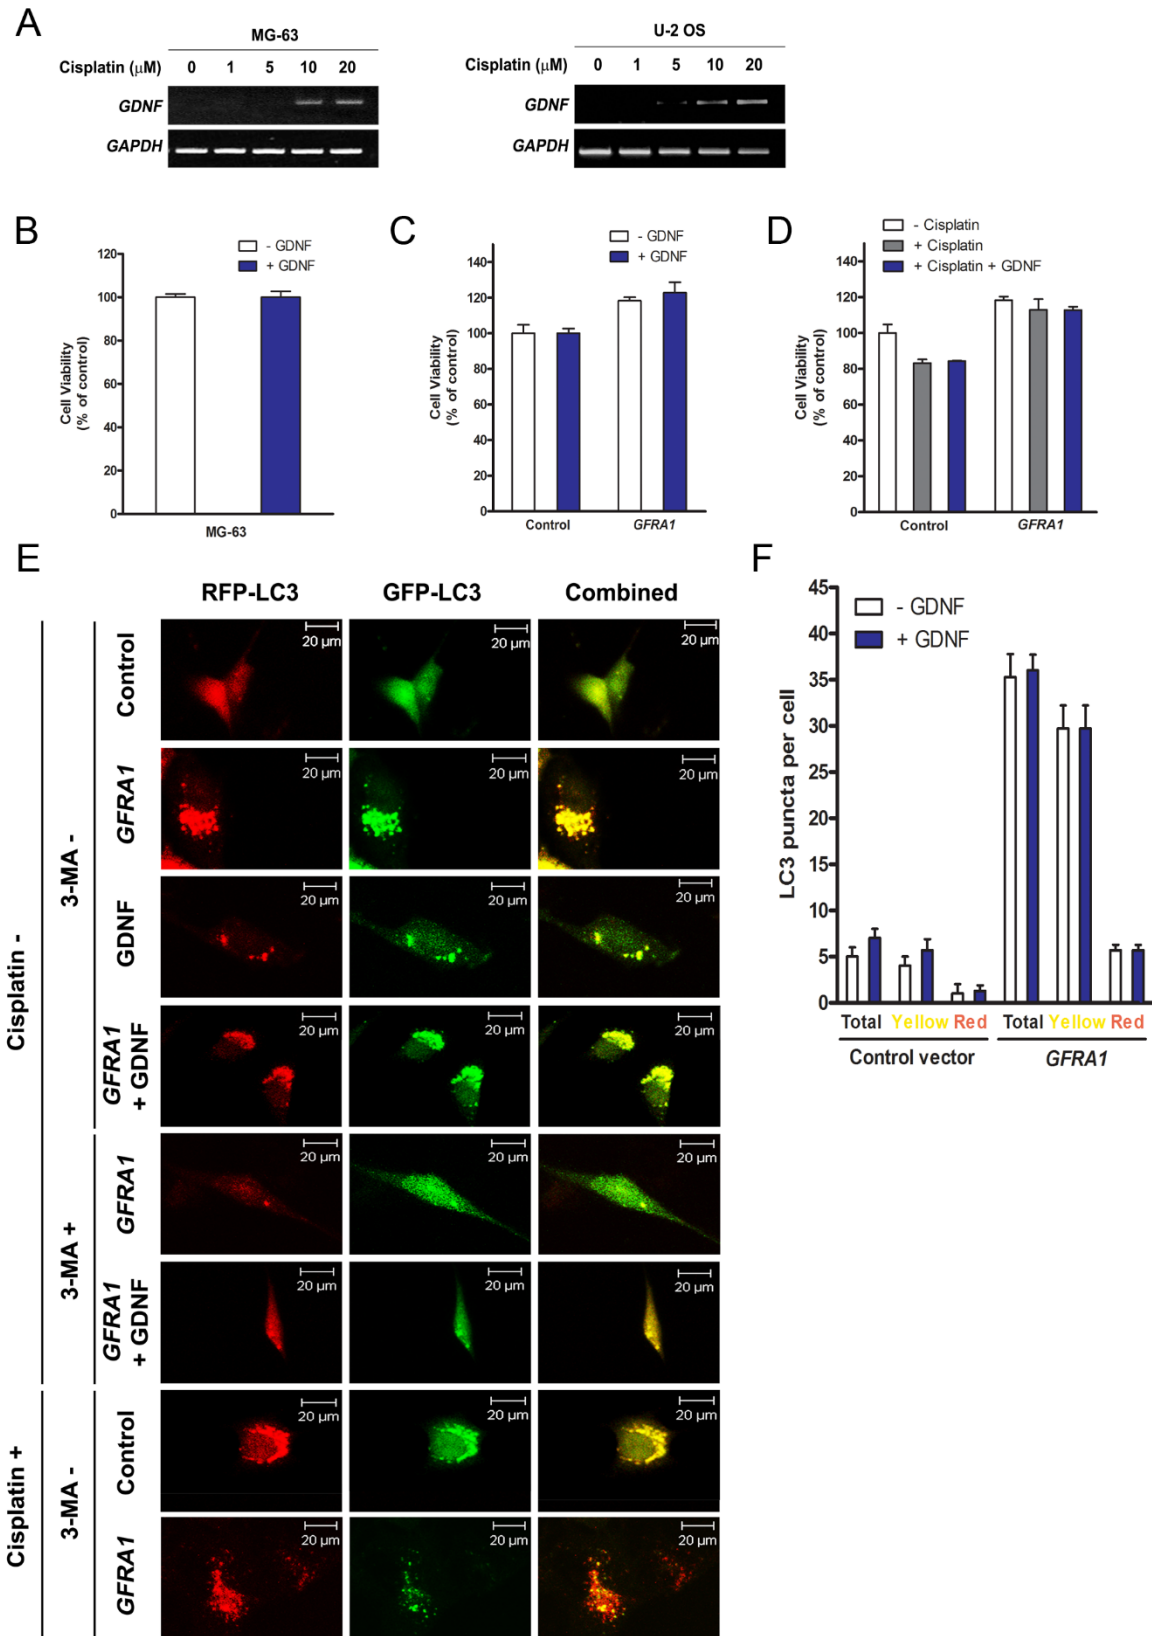

**Figure S2.** GFRA1-mediated chemoresistance of osteosarcoma cells is independent of GDNF. (A) Quantitative real-time PCR of *GDNF* mRNA expression after cisplatin treatment. MG-63 and U-2 OS cells were treated with different concentrations of cisplatin for 24 h. (B to D) Cell viability was measured using the WST-1 assay. The values are represented as a mean  $\pm$  s.d.m. (n=3). (B) MG-63 cells were treated with PBS or GDNF (50 ng/ml) for 24 h. (C) Control and GFRA1-overexpressing cells were cultured and treated with PBS or GDNF for 24 h. (D) Control and GFRA1-overexpressing cells were treated and cultured with PBS only, cisplatin, or cisplatin + GDNF (50 ng/ml) for 24 h, respectively. (E) Representative images of mRFP-LC3 and GFP-LC3 puncta. Scale bar: 20  $\mu$ m. Control and GFRA1-overexpressing MG-63 cells were transiently transfected with a mRFP-GFP tandem fluorescent-tagged LC3 plasmid (*mRFP-GFP-LC3*) and then treated with PBS (Cisplatin -) or cisplatin (20  $\mu$ M; Cisplatin +) for 24 h. Control and GFRA1-overexpressing MG-63 cells were also transiently transfected with a mRFP-GFP tandem fluorescent-tagged LC3 plasmid (*mRFP-GFP-LC3*) and then treated with PBS or GDNF for 24 h in the absence (3-MA -) or presence (3-MA +) of 3-MA. Scale bar: 20  $\mu$ m. (F) Quantitative analysis of the number of yellow puncta and the number of mRFP-LC3 puncta in the combined images of Control and GFRA1-overexpressing MG-63 cells treated with GDNF (50 ng/ml). The values are presented as a mean  $\pm$  s.d.m. (n=3).

Figure S3

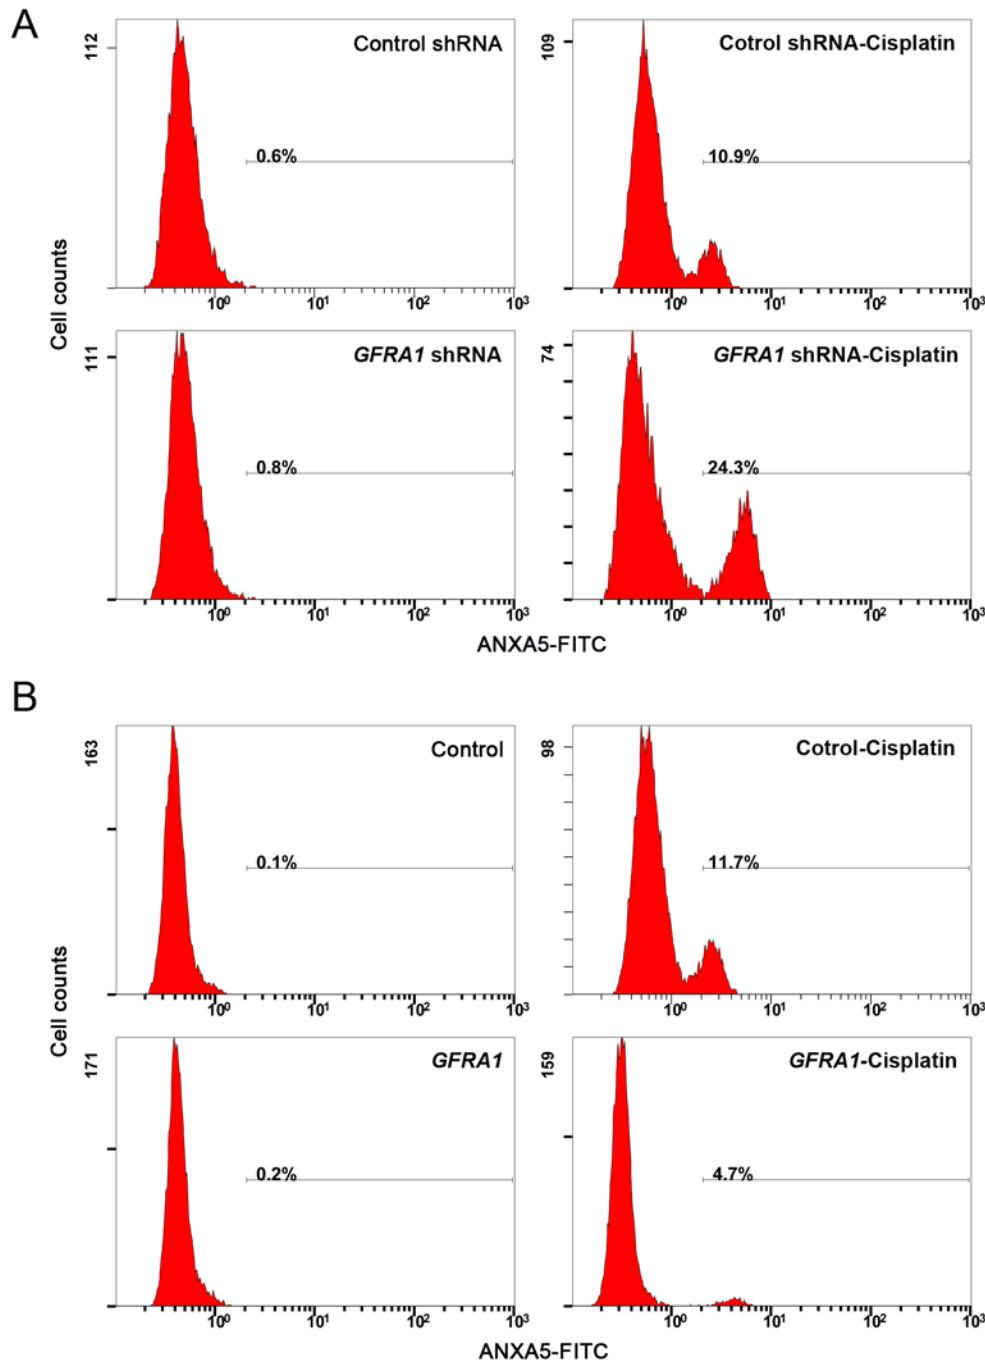

**Figure S3.** Effect of GFRA1 on cisplatin-induced apoptosis in MG-63 cells. **(A)** Apoptotic cells were counted in control or GFRA1-deficient MG-63 cells by flow cytometry 24 h after cisplatin treatment. **(B)** Under the same conditions, apoptotic cells were counted in control or GFRA1-overexpressing MG-63 cells.

Figure S4

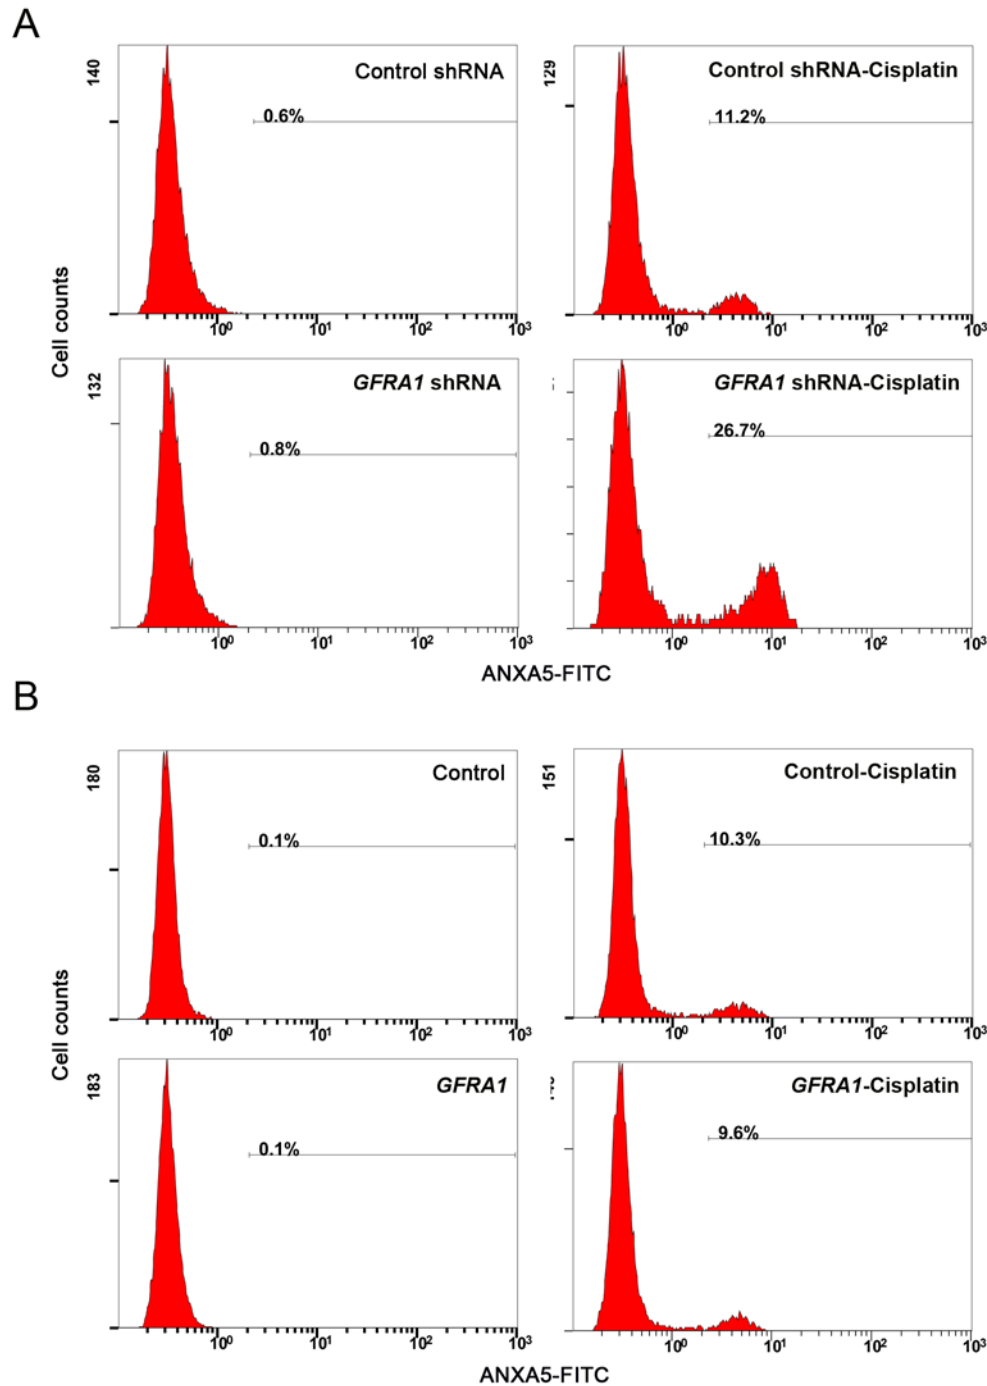

**Figure S4.** Effect of GFRA1 on cisplatin-induced apoptosis in U-2 OS cells. **(A)** Apoptotic cells were counted in control and GFRA1-deficient U-2 OS cells by flow cytometry 24 h after cisplatin treatment. **(B)** Under the same conditions, apoptotic cells were counted in control or GFRA1-overexpressing U-2 OS cells.

Figure S5

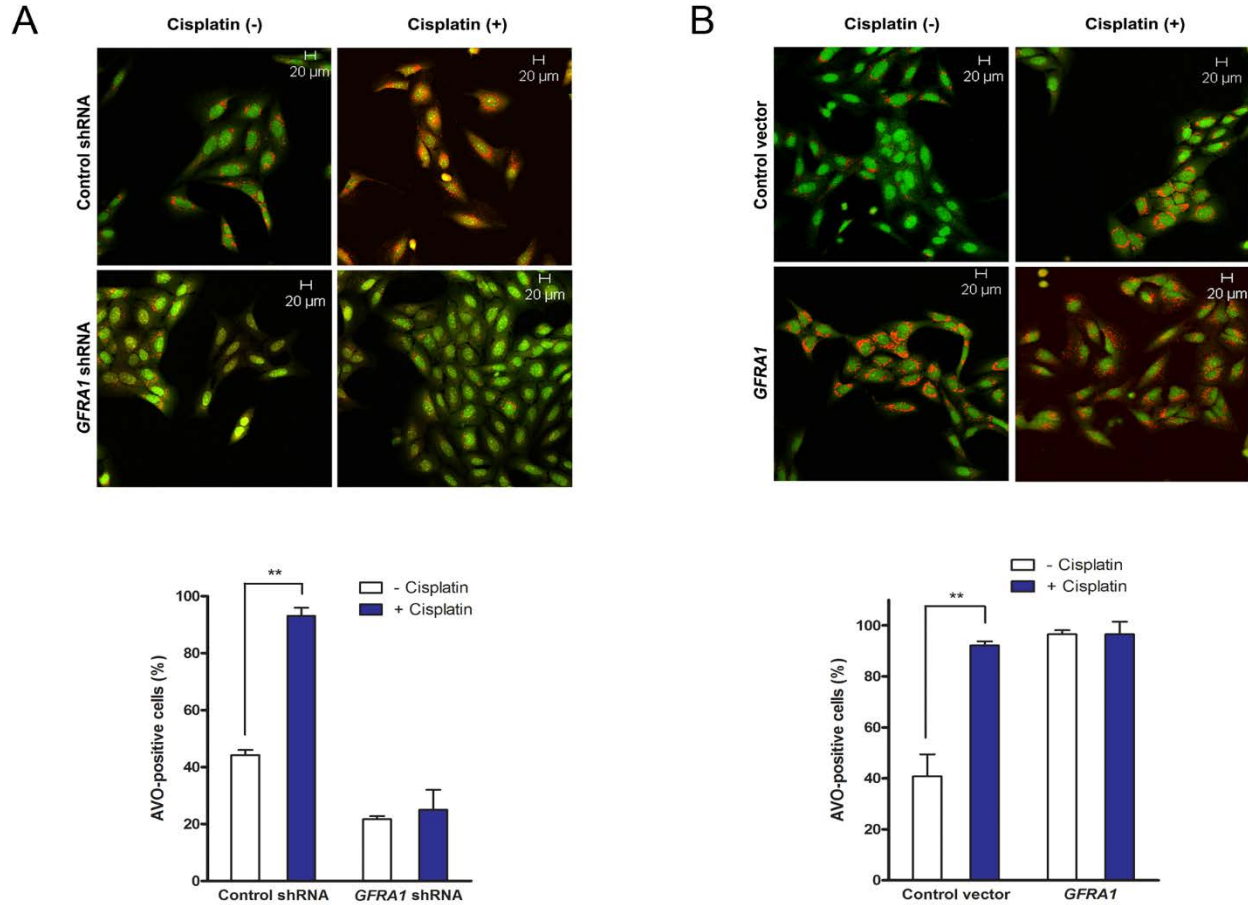

**Figure S5.** Acridine orange staining of GFRA1-deficient and GFRA1-overexpressing U-2 OS cells after cisplatin treatment. **(A)** Control and GFRA1-deficient U-2 OS cells were treated with cisplatin (20  $\mu$ M) for 24 h and then stained with acridine orange (0.5  $\mu$ g/ml) for 15 min. Top, representative images of cells stained with acridine orange. Scale bar: 20  $\mu$ m. Bottom, quantitative analysis of the number of AVOs. The values are represented as a mean  $\pm$  s.d.m. (n=3). \*\* denotes  $P < 0.05$ . **(B)** Control and GFRA1-overexpressing U-2 OS cells were treated with cisplatin (20  $\mu$ M) for 24 h and then stained with acridine orange. Top, representative images of cells stained with acridine orange. Scale bar: 20  $\mu$ m. Bottom, quantitative analysis of the number of AVOs. The values are represented as a mean  $\pm$  s.d.m. (n=3). \*\* denotes  $P < 0.05$ .

Figure S6

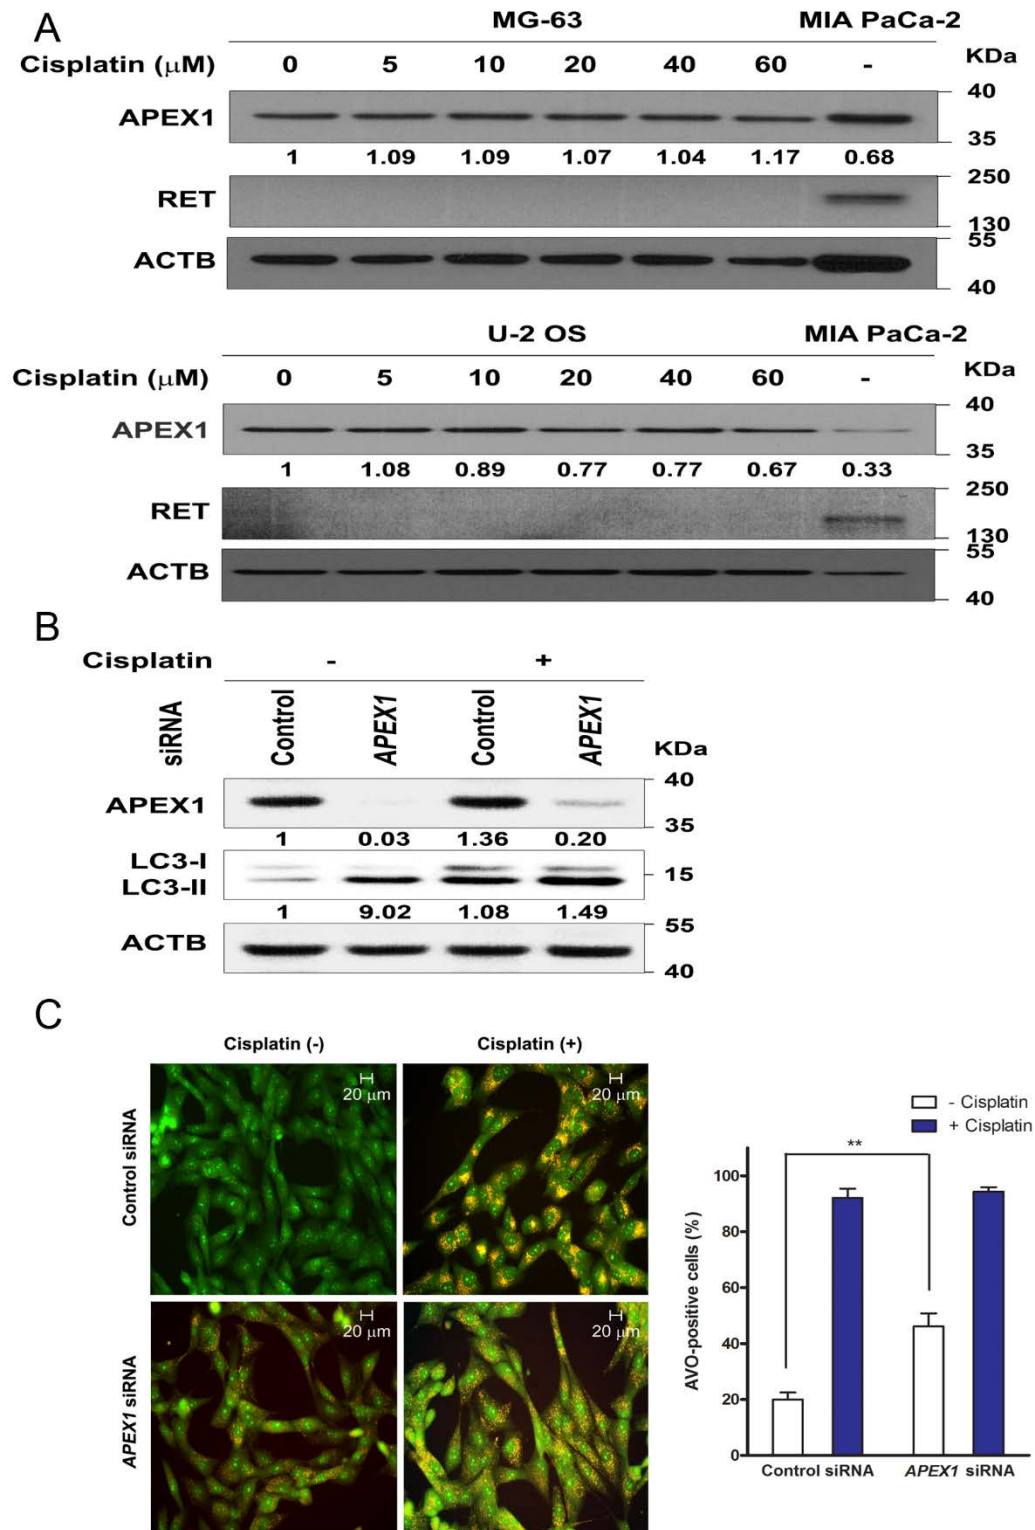



**Figure S6.** GFRA1-mediated chemoresistance of osteosarcoma cells is independent of APEX1 and RET signaling. **(A)** Immunoblot analysis of MG-63 or U-2 OS cell lysates with antibodies specific for APEX1, RET and ACTB. Cells were treated with the indicated concentrations of cisplatin for 24 h. The cell lysates of GDNF-treated MIA PaCa-2 were used as positive control for APEX1 and RET expression. The numbers below the lanes indicate densitometric quantification of APEX1 relative to ACTB control. **(B)** Immunoblot analysis of control and MG-63 cell lysates with antibodies specific for APEX1, LC3B and ACTB. MG-63 cells were cultured with control or *APEX1* siRNA for 48 h and then treated with cisplatin (20  $\mu$ M) for 24 h. **(C)** Control and APEX1-deficient MG-63 cells were treated with cisplatin (20  $\mu$ M) for 24 h and then stained with acridine orange (0.5  $\mu$ g/ml) for 15 min. Top, representative images of cells stained with acridine orange. Scale bar: 20  $\mu$ m. Bottom, quantitative analysis of the number of AVOs. The values are presented as a mean  $\pm$  s.d.m. (n=3). \*\* denotes  $P < 0.05$ .

**Figure S7**

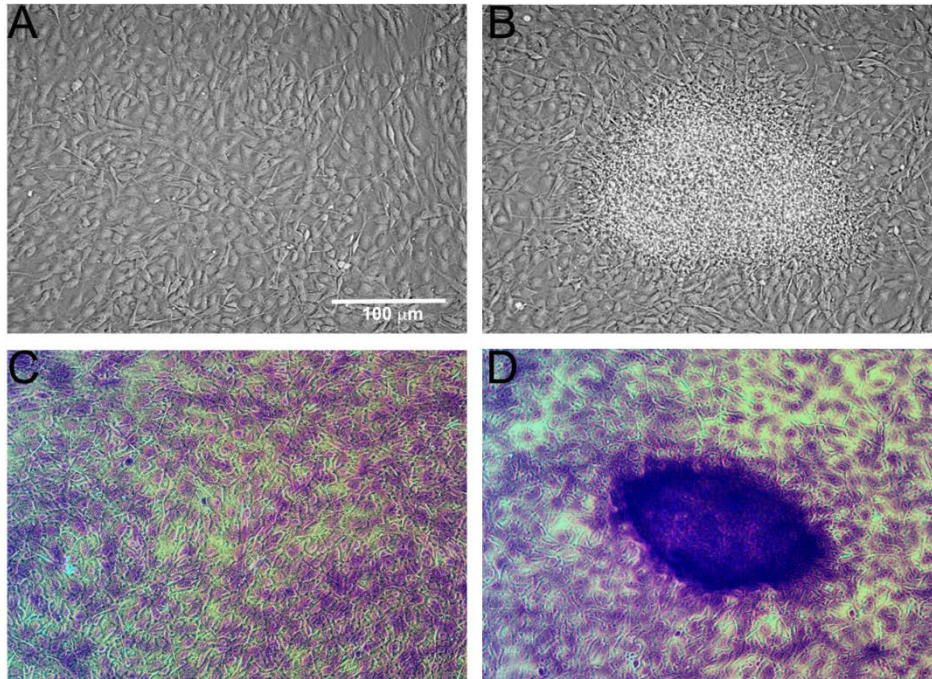

**Figure S7.** Cellular transformation of NIH3T3 cells by GFRA1. NIH3T3 cells ( $1 \times 10^6$ ) were cocultured with NIH3T3 cells ( $1 \times 10^3$ ) expressing empty vector or *GFRA1*. (**A and B**) Representative images of phase-contrast microscopy (**C and D**) Representative images of crystal violet staining. Scale bar: 100  $\mu\text{m}$ .

**Figure S8**

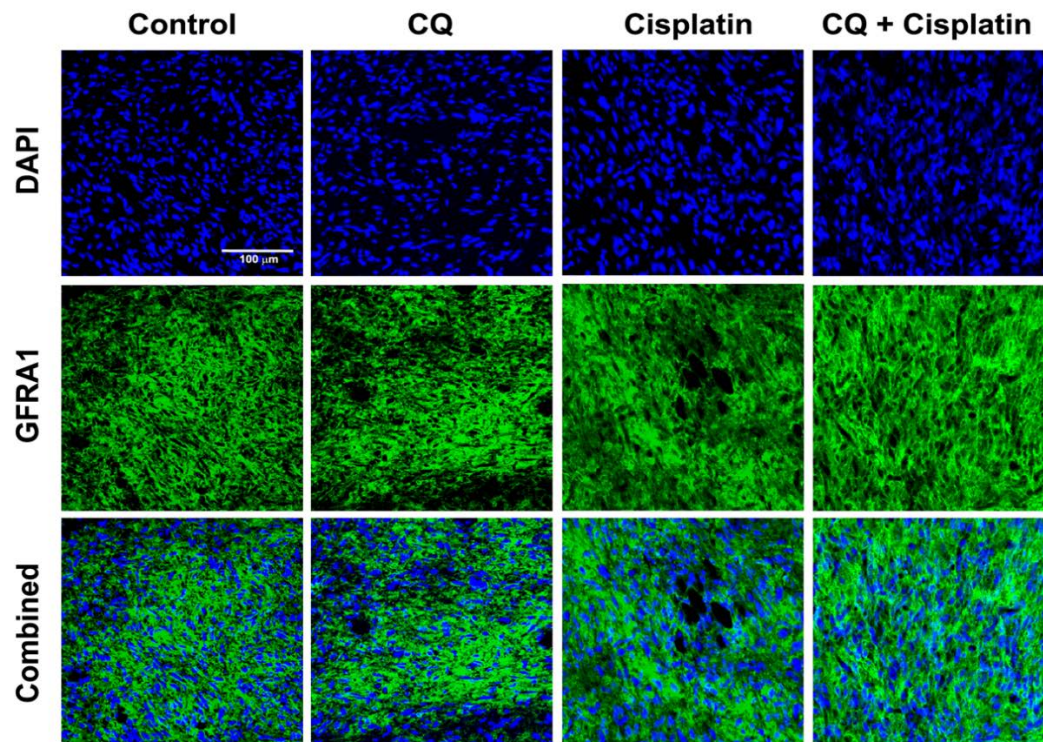

**Figure S8.** Representative images of immunofluorescence staining of GFRA1 in tumor sections generated from mice injected with MG-63 cells containing a GFRA1 expression vector and then treated with PBS, CQ, cisplatin, or cisplatin + CQ. Scale bar: 100  $\mu$ m.

**Table S1.** Information of 27 osteosarcoma patients.

| Case No. | Gender | Age | Diagnosis                         | Chemotherapy  |       |       |               |       |       |
|----------|--------|-----|-----------------------------------|---------------|-------|-------|---------------|-------|-------|
|          |        |     |                                   | Before        |       |       | After         |       |       |
|          |        |     |                                   | DAPI Staining | GFRA1 | HMGB1 | DAPI Staining | GFRA1 | HMGB1 |
| 1        | M      | 15  | Osteosarcoma, chondroblastic type | +             | -     | -     | +             | -     | -     |
| 2        | M      | 15  | Osteosarcoma, chondroblastic type | +             | -     | -     | +             | -     | -     |
| 3        | M      | 7   | Parosteal osteosarcoma            | +             | -     |       | +             | -     | -     |
| 4        | M      | 7   | Osteosarcoma, osteoblastic type   | +             | -     | -     | +             | +     | +     |
| 5        | F      | 76  | Osteosarcoma, osteoblastic type   | +             | -     | -     | +             | -     | -     |
| 6        | M      | 20  | Osteosarcoma, osteoblastic type   | +             | -     | -     | +             | +     | +     |
| 7        | F      | 3   | Osteosarcoma, osteoblastic type   | +             | -     | -     | +             | +     | +     |
| 8        | F      | 17  | Osteosarcoma, osteoblastic type   | +             | -     | -     | +             | +     | +     |
| 9        | M      | 20  | Osteosarcoma, osteoblastic type   | +             | -     | -     | +             | -     | -     |
| 10       | M      | 16  | Osteosarcoma, telangiectatic type | +             | -     | -     | -             | ND    | ND    |
| 11       | M      | 24  | Parosteal osteosarcoma            | +             | -     | -     | -             | ND    | ND    |
| 12       | F      | 8   | Osteosarcoma, chondroblastic type | +             | -     | -     | -             | ND    | ND    |
| 13       | M      | 12  | Osteosarcoma, chondroblastic type | +             | -     | -     | -             | ND    | ND    |
| 14       | F      | 10  | Osteosarcoma, osteoblastic type   | +             | -     | -     | -             | ND    | ND    |
| 15       | M      | 10  | Osteosarcoma, osteoblastic type   | +             | -     | -     | -             | ND    | ND    |
| 16       | F      | 15  | Osteosarcoma, osteoblastic type   | +             | -     | -     | -             | ND    | ND    |
| 17       | F      | 6   | Osteosarcoma, osteoblastic type   | +             | -     | -     | -             | ND    | ND    |
| 18       | M      | 32  | Osteosarcoma, chondroblastic type | +             | -     | -     | -             | ND    | ND    |
| 19       | F      | 26  | Osteosarcoma, osteoblastic type   | +             | -     | -     | -             | ND    | ND    |
| 20       | M      | 13  | Osteosarcoma, osteoblastic type   | +             | -     | -     | -             | ND    | ND    |
| 21       | M      | 14  | Osteosarcoma, osteoblastic type   | +             | -     | -     | -             | ND    | ND    |
| 22       | F      | 10  | Osteosarcoma, osteoblastic type   | +             | -     | -     | -             | ND    | ND    |
| 23       | M      | 11  | Osteosarcoma, osteoblastic type   | +             | -     | -     | -             | ND    | ND    |
| 24       | F      | 17  | Osteosarcoma, osteoblastic type   | +             | -     | -     | -             | ND    | ND    |
| 25       | M      | 16  | Osteosarcoma, osteoblastic type   | +             | -     | -     | -             | ND    | ND    |
| 26       | M      | 14  | Osteosarcoma, osteoblastic type   | +             | -     | -     | -             | ND    | ND    |
| 27       | F      | 10  | Osteosarcoma, osteoblastic type   | +             | -     | -     | -             | ND    | ND    |

Nine patients (cases No. 1 to 9) showed chemoresistance after treatment. Tissue samples from patients are collected and analyzed for GFRA1 and HMGB1 immunostaining before and after chemotherapy. ND, not determined. No DAPI-positive cells were observed from samples of 18 patients (cases No. 10 to 27) and the expression of GFRA1 and HMGB1 was not determined.

**Table S2.** Clinicopathological characteristics of 9 osteosarcoma patients that showed chemoresistance.

| <b>Parameter</b>            | <b>n</b> | <b>GFRA1<br/>Expression<br/>n (%)</b> | <b>HMGB1<br/>Expression<br/>n (%)</b> |
|-----------------------------|----------|---------------------------------------|---------------------------------------|
| Gender                      |          |                                       |                                       |
| Female                      | 3        | 2 (66.7)                              | 2 (66.7)                              |
| Male                        | 6        | 2 (33.3)                              | 2 (33.3)                              |
| Age                         |          |                                       |                                       |
| > 20 years old              | 1        | 0 (0)                                 | 0 (0)                                 |
| ≤ 20 years old              | 8        | 4 (50.0)                              | 4 (50.0)                              |
| Tumor site                  |          |                                       |                                       |
| Distal femur                | 6        | 3 (50)                                | 3 (50)                                |
| Proximal femur              | 1        | 1 (100)                               | 1 (100)                               |
| Others                      | 2        | 0 (0)                                 | 0 (0)                                 |
| Histological classification |          |                                       |                                       |
| Osteoblastic                | 6        | 4 (66.7)                              | 4 (66.7)                              |
| Chondroblastic              | 2        | 0 (0)                                 | 0 (0)                                 |
| Others                      | 1        | 0 (0)                                 | 0 (0)                                 |
| Treatment period (weeks)    |          |                                       |                                       |
| < 4                         | 2        | 0 (0)                                 | 0 (0)                                 |
| 4 – 15                      | 7        | 4 (57.1)                              | 4 (57.1)                              |
| Metastatic status           |          |                                       |                                       |
| Non-metastatic              | 5        | 0 (0)                                 | 0 (0)                                 |
| Metastatic (lung)           | 4        | 4 (100)                               | 4 (100)                               |
